# Supplementary material for: Mining the Cambridge Database for theoretical chemistry. Mi-LJC: a new set of Lennard-Jones–Coulomb atom–atom potentials for the computer simulation of organic condensed matter
Source: Royal Society of Chemistry journal article supplement (doi:10.1039/d0ce00334d), 2020-01-01
Supplement: d0ce00334d2.pdf [file d0ce00334d2.pdf]

## Mining the Cambridge Database for theoretical chemistry. Mi-LJC: A new set of Lennard-Jones-Coulomb atom-atom potentials for the computer simulation of organic condensed matter

Angelo Gavezzotti<sup>1,2</sup>, Leonardo Lo Presti<sup>1</sup> and Silvia Rizzato<sup>1</sup>

<sup>1</sup> Dipartimento di Chimica, Università degli studi di Milano, Via Golgi 19, 20133 Milano

<sup>2</sup> On permanent leave.

Experimental  $\Delta H_s$  and lattice energy data for the 377-molecule data set ( $\text{kJ}\cdot\text{mol}^{-1}$ ). “CSD refcode” is the Cambridge Structural Database reference codes.  $E_{\text{LJC}}$  and  $E_{\text{CLP}}$  are lattice energies by LJC or CLP functional.

| CSD refcode | $\Delta H_s$ | $E_{\text{LJC}}$ | %Dev | $E_{\text{CLP}}$ | %Dev  | compound name                     |
|-------------|--------------|------------------|------|------------------|-------|-----------------------------------|
| ACETAC03    | 66.4         | 64.7             | 2.6  | 67.4             | -1.5  | acetic acid                       |
| FORMAC01    | 60.2         | 56.5             | 6.3  | 56.1             | 6.9   | formic acid                       |
| FUMAAC01    | 136.4        | 119.5            | 12.4 | 122.5            | 10.2  | trans-butenedioic acid            |
| GLURAC13    | 130.6        | 129.3            | 1    | 143.2            | -9.6  | glutaric acid                     |
| HIFKUC      | 87.1         | 88.4             | -1.5 | 82.6             | 5.1   | 3-furancarboxylic acid            |
| MALIAC13    | 109.2        | 107.4            | 1.7  | 109.2            | 0     | cis-butenedioic acid maleic acid. |
| MALNAC16    | 109.2        | 107              | 2.1  | 123.3            | -12.9 | malonic acid                      |
| MEMALA01    | 115          | 118.7            | -3.2 | 125.6            | -9.2  | methylmalonic acid                |
| OXALAC08    | 95.2         | 99.8             | -4.8 | 119.1            | -25.1 | oxalic acid anhydrous.            |
| PRONAC      | 72.1         | 72.3             | -0.2 | 77.6             | -7.6  | propionic acid                    |
| SUCACB18    | 122          | 117.1            | 4    | 129.5            | -6.1  | succinic acid                     |
| ADIPAC20    | 144.5        | 131.6            | 9    | 137              | 5.2   | adipic acid                       |
| BENZAC20    | 91           | 94.9             | -4.2 | 86.2             | 5.3   | benzoic acid                      |
| CLBZAC02    | 110          | 101.3            | 7.9  | 99.2             | 9.8   | 2-chlorobenzoic acid              |
| CLBZAP13    | 105          | 101.8            | 3.1  | 98.6             | 6.1   | 4-chlorobenzoic acid              |
| COVJIG01    | 94.3         | 97               | -2.8 | 90.2             | 4.4   | 3-fluorobenzoic acid              |
| FBENZA02    | 94           | 99.2             | -5.5 | 97.6             | -3.8  | 2-fluorobenzoic acid              |
| FURDCA      | 122.8        | 109.2            | 11.1 | 130.4            | -6.1  | furan-2,5-dicarboxylic            |
| MCBZAC02    | 104          | 102.3            | 1.6  | 101.1            | 2.7   | 3-chlorobenzoic acid              |
| PFBZAD15    | 93           | 91.8             | 1.3  | 87.6             | 5.9   | 4-fluorobenzoic acid              |
| BENZDC11    | 142          | 134              | 5.7  | 133.7            | 5.8   | isophthalic acid                  |
| OTOLIC02    | 96           | 97.8             | -1.8 | 94.5             | 1.6   | o-toluic acid                     |
| PHTHAC06    | 130          | 134.6            | -3.5 | 138.4            | -6.5  | phthalic acid                     |
| CSD name    | $\Delta H_s$ | $E_{\text{LJC}}$ | D%   | $E_{\text{CLP}}$ | D%    | compound name                     |
| PIMELA15    | 140          | 142.6            | -1.8 | 155              | -10.7 | heptanedioic acid                 |
| PTOLIC01    | 99           | 93.3             | 5.7  | 93.9             | 5.2   | p-toluic acid                     |

|          |              |           |       |           |       |                              |
|----------|--------------|-----------|-------|-----------|-------|------------------------------|
| TEPHTH14 | 146          | 140       | 4.1   | 132.1     | 9.5   | terephthalic acid            |
| DMBNZA11 | 99           | 99.1      | -0.1  | 100.2     | -1.2  | 2,6-dimethylbenzoic acid     |
| DMBZAC01 | 105          | 100.9     | 3.9   | 99.9      | 4.9   | 2,3-dimethylbenzoic acid     |
| RUVQAA   | 110          | 105.7     | 3.9   | 105.7     | 4     | 2,4,5-trimethylbenzoic       |
| WIZJUL   | 104          | 102       | 1.9   | 105.1     | -1.1  | 2,4-dimethylbenzoic acid     |
| CINMAC   | 107          | 101.8     | 4.9   | 96.4      | 9.9   | trans cinnamic acid          |
| TMBZAC01 | 104          | 97.9      | 5.9   | 107.3     | -3.2  | 2,4,6-trimethylbenzoic       |
| TMEBZA   | 111          | 104.2     | 6.1   | 104       | 6.3   | 3,4,5-trimethylbenzoic       |
| NAPACA12 | 112          | 113.8     | -1.6  | 120.2     | -7.3  | 1-naphthaleneacetic          |
| NAPOAC01 | 115.4        | 108.3     | 6.2   | 108.5     | 6     | 1-naphthoic acid             |
| PEYGEF01 | 124          | 122.9     | 0.9   | 131.3     | -5.9  | 2-naphthaleneacetic          |
| NAPHAC02 | 118.4        | 112.5     | 5     | 108.2     | 8.6   | 2-naphthoic acid             |
| ISENUP   | 113          | 105.6     | 6.6   | 110.3     | 2.4   | octanoic                     |
| SUBRAC12 | 148          | 149.5     | -1    | 152       | -2.7  | octanedioic                  |
| QQQFDJ01 | 122.1        | 135.5     | -11   | 136.5     | -11.8 | 9-anthracenecarboxylic       |
| DCLPHM01 | 87           | 88.1      | -1.3  | 100.1     | -15   | 3,4-dichlorophenol           |
| DNOPHL02 | 104.3        | 103.3     | 0.9   | 115.1     | -10.3 | 2,4-dinitrophenol            |
| DNPHOL02 | 112.3        | 105.5     | 6.1   | 122.9     | -9.4  | 2,6-dinitrophenol            |
| LETFEV   | 73           | 78.5      | -7.5  | 91.7      | -25.6 | 3,5-diFluorophenol           |
| NITPOL08 | 95           | 94.5      | 0.5   | 94        | 1     | 4-nitrophenol                |
| NTCPOL01 | 88           | 87.2      | 0.9   | 90.5      | -2.9  | 4-chloro-2-nitrophenol       |
| ONITPH   | 73           | 77        | -5.4  | 87.8      | -20.3 | 2-nitrophenol                |
| PBRPOL   | 85           | 84.4      | 0.7   | 90.3      | -6.2  | 4-bromophenol                |
| PCPHOL01 | 93.2         | 107.9     | -15.8 | 117.1     | -25.7 | pentachlorophenol            |
| QQQBNG01 | 74           | 78.2      | -5.7  | 75.5      | -2    | 4-Fluorophenol               |
| SILGOK   | 82.7         | 83.9      | -1.4  | 92.6      | -11.9 | 2,4,6-trichlorophenol        |
| CSD name | $\Delta H_s$ | $E_{LIC}$ | D%    | $E_{CLP}$ | D%    | compound name                |
| TEMWUD   | 74.5         | 79.8      | -7.2  | 95.7      | -28.5 | 2-nitro-1,3-dihydroxybenzene |
| UCAYED01 | 67.2         | 79.7      | -18.6 | 88.9      | -32.4 | pentaFluorophenol            |
| AMPHOL01 | 108          | 103.2     | 4.5   | 111.9     | -3.6  | 4-aminophenol                |
| AMPHOM02 | 101          | 96.9      | 4.1   | 99.9      | 1.1   | 2-aminophenol                |
| BESKAL   | 130          | 123.4     | 5.1   | 151       | -16.1 | 2,5-dihydroxybenzoic acid    |
| BIDLOP02 | 123          | 123       | 0     | 121       | 1.6   | 3-hydroxybenzoic acid        |
| CACDAM01 | 111          | 112       | -0.9  | 135.2     | -21.8 | 2,3-dihydroxybenzoic acid    |
| CATCOL16 | 85           | 96.1      | -13   | 114.1     | -34.3 | 1,2-dihydroxybenzene         |
| FECCOF01 | 110          | 125.6     | -14.2 | 132.4     | -20.4 | 1,6-hexanediol               |
| HYQUIN08 | 100.4        | 111.2     | -10.7 | 108.3     | -7.8  | 1,4-dihydroxybenzene         |
| LEZJAB01 | 109          | 115.2     | -5.7  | 132.4     | -21.5 | 2,6-dihydroxybenzoic acid    |
| MAMPOL   | 104          | 95.1      | 8.5   | 104.7     | -0.7  | 3-aminophenol                |
| PHBALD11 | 101          | 90.7      | 10.2  | 107.6     | -6.5  | 4-hydroxybenzaldehyde        |
| PHGLOL01 | 134          | 130.7     | 2.4   | 160.8     | -20   | 1,3,5-trihydroxybenzene      |
| RESORA03 | 93           | 105.7     | -13.6 | 113.5     | -22   | 1,3-dihydroxybenzene         |
| SALIAC19 | 97           | 95.4      | 1.6   | 108       | -11.3 | 2-hydroxybenzoic acid        |
| XAYCIJ   | 100          | 88.2      | 11.8  | 110.6     | -10.6 | 3-hydroxybenzaldehyde        |

|          |              |           |       |           |       |                                         |
|----------|--------------|-----------|-------|-----------|-------|-----------------------------------------|
| YELRIR   | 89           | 89.6      | -0.7  | 95.1      | -6.9  | 2-methyl-3-hydroxypyridine              |
| ZZZEU04  | 125          | 129.5     | -3.6  | 145.9     | -16.7 | 2,4-dihydroxybenzoic acid               |
| DIMEDO02 | 100          | 103.2     | -3.2  | 122.8     | -22.8 | 5,5-dimethyl-1,3-cyclohexanedione       |
| DIMPHE12 | 84.1         | 85.1      | -1.1  | 102.3     | -21.7 | 2,3-dimethylphenol                      |
| DMEPOL10 | 75.5         | 77.5      | -2.7  | 90.1      | -19.3 | 2,6-dimethylphenol                      |
| DMPHOL11 | 85.1         | 83        | 2.5   | 91.8      | -7.8  | 2,5-dimethylphenol                      |
| HACTPH16 | 96.7         | 100.1     | -3.4  | 123.4     | -27.6 | 4-hydroxyacetophenone                   |
| SALMID02 | 101          | 98.8      | 2.1   | 110.6     | -9.5  | 2-hydroxybenzamide                      |
| VIDMAX   | 125          | 124.7     | 0.2   | 142.1     | -13.7 | 4-hydroxybenzamide                      |
| FAMDIG   | 112          | 93.6      | 16.4  | 104.2     | 6.9   | 5-chloro-8-hydroxyquinoline             |
| FESNOG02 | 172.3        | 167       | 3.1   | 193       | -12   | 3,4-dihydroxycinnamic acid caffeic acid |
| HEGFAB   | 116          | 116.8     | -0.7  | 137.1     | -18.2 | 1,3-dihydroxynaphthalene                |
| CSD name | $\Delta H_s$ | $E_{LIC}$ | D%    | $E_{CLP}$ | D%    | compound name                           |
| HXQUIN11 | 89           | 84.5      | 5     | 98.7      | -10.8 | 8-hydroxyquinoline                      |
| IPMEPL   | 91           | 85.8      | 5.8   | 95.6      | -5.1  | 2-isopropyl-5-methylphenol thymol       |
| NAPHOL01 | 90           | 93.5      | -3.9  | 103.3     | -14.8 | 1-naphthol                              |
| XAXSIY   | 90           | 85.3      | 5.2   | 98.4      | -9.3  | 2,4,6-trimethylphenol                   |
| BOPSAA10 | 110          | 114.9     | -4.4  | 128.9     | -17.2 | 4-hydroxybiphenyl                       |
| DOHDPH02 | 143          | 145.2     | -1.6  | 169.9     | -18.8 | 4,4'-dihydroxybiphenyl                  |
| NUTSUQ   | 114          | 120.8     | -5.9  | 122.8     | -7.7  | 2,2'-dihydroxybiphenyl                  |
| ACEMID05 | 79           | 79.3      | -0.3  | 78.4      | 0.8   | acetamide                               |
| APYFEB01 | 113          | 108.8     | 3.7   | 88.3      | 21.9  | tetrahydro-2-pyrimidone                 |
| ARCLAM01 | 82.6         | 78.6      | 4.9   | 76        | 8     | acrylamide                              |
| CROTAM   | 81.4         | 77.2      | 5.3   | 83        | -2    | trans 2-butenic acid amide              |
| DIACHZ   | 104.1        | 98.5      | 5.3   | 96.5      | 7.3   | 1,2-diacetylhydrazine                   |
| DIKPIPO3 | 106.6        | 123.8     | -16.1 | 115.3     | -8.2  | 2,5-piperazinedione                     |
| DIXTAF01 | 88           | 82.3      | 6.5   | 90.9      | -3.3  | 2,2-dimethylpropanamide                 |
| FEPGEM   | 75           | 75.6      | -0.7  | 87.8      | -17   | methyl carbamate                        |
| FORMAM02 | 72           | 66.2      | 8.2   | 66.3      | 8     | formamide                               |
| GLUTIM   | 94           | 88        | 6.3   | 102.8     | -9.3  | glutarimide                             |
| IBURAM   | 86           | 79.1      | 8     | 81.1      | 5.7   | 2-methylpropanamide                     |
| KIKREC   | 101          | 108.2     | -7.1  | 112.9     | -11.7 | N-propylurea                            |
| MALOAM02 | 126          | 129.1     | -2.4  | 143.5     | -13.9 | malonamide                              |
| MEUREA01 | 97.4         | 95.2      | 2.3   | 94.5      | 3     | N-methylurea                            |
| NIHJU04  | 89           | 80.5      | 9.6   | 86.8      | 2.5   | 1,3-dimethylurea                        |
| PYZIN23  | 89.3         | 82.6      | 7.5   | 94        | -5.3  | pyrazine carboxamide                    |
| QQQGEM01 | 103          | 103.5     | -0.4  | 119.8     | -16.2 | acetylurea                              |
| SUCCIN09 | 86.2         | 82.5      | 4.4   | 92.3      | -7    | succinimide                             |
| TFACAM   | 79           | 74.6      | 5.6   | 72.2      | 8.6   | triFluoroacetamide                      |
| UREAXX25 | 97.6         | 94.2      | 3.5   | 102.2     | -4.6  | urea                                    |
| WIFKEB02 | 95           | 91.2      | 4.1   | 90.3      | 5     | 1,1-dimethylurea                        |
| YAQLAE   | 97           | 98.2      | -1.2  | 104       | -7.2  | N-ethylurea                             |
| CSD name | $\Delta H_s$ | $E_{LIC}$ | D%    | $E_{CLP}$ | D%    | compound name                           |
| YAQLEI   | 104.4        | 109.5     | -4.8  | 118.2     | -13.1 | N-butylurea                             |

|          |              |           |       |           |       |                                            |
|----------|--------------|-----------|-------|-----------|-------|--------------------------------------------|
| ZZZKDQ01 | 85.3         | 87.8      | -3    | 87.4      | -2.5  | butyramide                                 |
| ZZZKJQ01 | 90           | 94.5      | -4.9  | 98.7      | -9.7  | pentanamide                                |
| BZAMID12 | 100.2        | 93.6      | 6.7   | 99.2      | 1     | benzamide                                  |
| BZOXZO   | 98           | 101.6     | -3.6  | 90.6      | 7.6   | 2-benzoxazolinone                          |
| CAPLAC   | 85.2         | 82.8      | 2.9   | 81.2      | 4.8   | epsilon-caprolactam                        |
| EHOWIH   | 115          | 104.2     | 9.4   | 106.5     | 7.4   | 4-pyridinecarboxamide                      |
| NICOAM06 | 120          | 104.1     | 13.2  | 100.5     | 16.2  | 3-pyridinecarboxamide                      |
| PICAMD06 | 93.4         | 91        | 2.6   | 99.8      | -6.8  | 2-pyridinecarboxamide                      |
| ACANIL06 | 87           | 98.2      | -12.9 | 109.9     | -26.4 | acetanilide                                |
| HQOXAL01 | 120.9        | 104.4     | 13.6  | 95.2      | 21.2  | 2-hydroxyquinoxaline                       |
| PHALIM04 | 106          | 95.5      | 9.9   | 92.5      | 12.8  | phthalimide                                |
| PHUREA02 | 138.2        | 121       | 12.4  | 128.9     | 6.7   | monophenylurea                             |
| WIGYIV   | 107          | 100.4     | 6.2   | 91.1      | 14.8  | 1-(2H)-phthalazinone                       |
| REZRIY   | 97.6         | 97        | 0.6   | 106.8     | -9.5  | N- 2-methylphenyl acetamide                |
| BRANIL   | 100          | 91.3      | 8.7   | 95.6      | 4.4   | 2,4,6-tribromoaniline                      |
| BRNIBZ   | 87           | 86.1      | 1.1   | 75.2      | 13.5  | 3-bromo-1-nitrobenzene                     |
| PBRANL01 | 79           | 73.3      | 7.2   | 74.7      | 5.5   | 4-bromoaniline                             |
| ULEBOD   | 87           | 87.1      | -0.1  | 78.6      | 9.6   | 4-bromo-1-nitrobenzene                     |
| VOQYUW   | 82           | 75.8      | 7.6   | 69.7      | 15    | 2,5-dibromopyridine                        |
| YAQZUM   | 85           | 87.7      | -3.2  | 75.6      | 11.1  | 2-bromo-1-nitrobenzene                     |
| BRBZAC01 | 109          | 110.7     | -1.6  | 99.8      | 8.4   | 2-bromobenzoic acid                        |
| BRBZAP01 | 107          | 106.5     | 0.5   | 94.8      | 11.4  | 4-bromobenzoic acid                        |
| CAJWEQ01 | 88           | 82.5      | 6.2   | 82.5      | 6.3   | 2,4-dibromoaniline                         |
| QQQFDS02 | 102          | 104       | -2    | 109.6     | -7.5  | 9-bromoanthracene                          |
| FIZZOD   | 95           | 94        | 1.1   | 93.1      | 2.1   | 5-methyltetrazole                          |
| FULPIM   | 88.4         | 77.3      | 12.5  | 84.8      | 4.1   | 2-methylimidazole                          |
| IMAZOL13 | 83           | 71.8      | 13.5  | 70.5      | 15.1  | imidazole                                  |
| ITIZOA   | 72.1         | 74.5      | -3.3  | 69.4      | 3.8   | piperazine                                 |
| CSD name | $\Delta H_s$ | $E_{LIC}$ | D%    | $E_{CLP}$ | D%    | compound name                              |
| TETZOL02 | 89           | 85.1      | 4.4   | 78.7      | 11.6  | tetrazole                                  |
| TRAZOL04 | 82           | 76        | 7.4   | 77.2      | 5.9   | 1,2,4-triazole                             |
| BZDMAZ04 | 100          | 96.4      | 3.6   | 97.4      | 2.6   | benzimidazole                              |
| ZBCNON   | 58           | 65.8      | -13.4 | 61.3      | -5.8  | 3-azabicyclo 3.2.2nonane                   |
| CRBZOL03 | 101          | 99.8      | 1.2   | 104.2     | -3.1  | carbazole                                  |
| KEMDOW   | 186          | 186       | 0     | 208.3     | -12   | guanine                                    |
| DMANAP10 | 94.7         | 92        | 2.9   | 102.8     | -8.5  | 1,8-N,N,N'N'-tetramethyldiaminonaphthalene |
| VUFZUR01 | 119.2        | 119.8     | -0.4  | 131.7     | -10.4 | 4-(N,N-dimethylamino azobenzene            |
| BOTYIT   | 77           | 75.2      | 2.3   | 79.6      | -3.4  | 2,4-dichloropyrimidine                     |
| DCPYAZ01 | 70           | 67.1      | 4.2   | 71.6      | -2.2  | 2,6-dichloropyrazine                       |
| HAMGOT   | 89.4         | 88.2      | 1.4   | 95.1      | -6.4  | 1,2,4-triazolo 1,5-apyrimidine             |
| TELPOP   | 87           | 79.3      | 8.9   | 68.1      | 21.8  | 1-methyltetrazole                          |
| TRIZIN01 | 57           | 59.7      | -4.6  | 65.3      | -14.5 | 1,3,5-triazine                             |
| HXMTAM23 | 80           | 89.5      | -11.9 | 71.5      | 10.6  | 1,3,5,7-tetraazatricyclo 3.3.1.13,7decane  |
| ZZZIVG02 | 61.3         | 59.4      | 3     | 64.9      | -5.9  | 4-methylpyridine                           |

|          |              |           |       |           |       |                                               |
|----------|--------------|-----------|-------|-----------|-------|-----------------------------------------------|
| ZZZKAO01 | 61           | 59.1      | 3.1   | 64.7      | -5.9  | 3-methylpyridine                              |
| DAZNAP   | 82           | 84.2      | -2.6  | 86.4      | -5.3  | phthalazine                                   |
| HEYJOK01 | 68           | 76.7      | -12.8 | 74.4      | -9.3  | quinoxaline 1,4                               |
| MPYRAZO2 | 95           | 78.1      | 17.8  | 103.6     | -9.1  | tetramethylpyrazine                           |
| BIPYRL04 | 80           | 87.2      | -9    | 97.2      | -21.5 | 2,2 -bipyridine                               |
| CHLQUI10 | 84           | 86.3      | -2.8  | 95.8      | -14.1 | 2-chloroquinoline                             |
| CLQUIN   | 81           | 82.3      | -1.6  | 84.2      | -4    | 6-chloroquinoline                             |
| EYIRIN   | 102          | 104.7     | -2.7  | 102.8     | -0.8  | 1-benzylimidazole                             |
| KEYNOR   | 87.7         | 84.6      | 3.5   | 103.3     | -17.8 | 2,3-dimethylquinoxaline                       |
| PHENAZ11 | 96           | 94.3      | 1.8   | 101.8     | -6.1  | phenazine                                     |
| PILFOG   | 85           | 85.8      | -1    | 94.9      | -11.7 | 2,6-dimethylquinoline                         |
| NAMKAN01 | 100          | 102.5     | -2.5  | 119.5     | -19.5 | 4,4' -dimethyl-2-2'bipyridyl                  |
| CLBENQ   | 68.6         | 74.2      | -8.3  | 82.3      | -20   | chlorobenzoquinone                            |
| DMEOXA06 | 75.3         | 81.4      | -8.1  | 81        | -7.6  | dimethyl oxalate                              |
| CSD name | $\Delta H_s$ | $E_{LIC}$ | D%    | $E_{CLP}$ | D%    | compound name                                 |
| ETHCAR   | 77           | 71.5      | 7.2   | 66.3      | 13.9  | ethylene carbonate                            |
| LIJFUG   | 86           | 86.1      | -0.2  | 102.6     | -19.3 | glutaric anhydride                            |
| MLEICA01 | 86.4         | 69.7      | 19.3  | 88.6      | -2.5  | maleic anhydride                              |
| NIKVUZ   | 69           | 57.1      | 17.3  | 80.9      | -17.2 | cyclobutane-1,2-dione                         |
| PTOXEC   | 88           | 91.3      | -3.7  | 90.6      | -3    | 1,3,5,7,9-pentoxecane                         |
| TOXOCN   | 80           | 80.9      | -1.1  | 97.4      | -21.7 | 1,3,5,7-tetroxane                             |
| TROXAN   | 56           | 63.3      | -12.9 | 70.9      | -26.5 | 1,3,5-trioxane                                |
| BNZQUI03 | 68.8         | 62.8      | 8.6   | 68        | 1.2   | 1,4-benzoquinone                              |
| CYHEX001 | 84           | 78.2      | 6.9   | 95.5      | -13.6 | 1,4-cyclohexanedione                          |
| GOCWEA   | 82           | 91.7      | -11.8 | 80.4      | 2     | trans-1,3,5,7-tetraoxadecalin                 |
| POKKAB   | 95           | 99.1      | -4.3  | 109.6     | -15.4 | cis-1,3,5,7-tetraoxadecalin                   |
| ZZZDRQ01 | 85           | 91.4      | -7.5  | 91.9      | -8.2  | dimethyl fumarate                             |
| BZCBUO   | 90.3         | 83.5      | 7.5   | 91.1      | -0.9  | benzocyclobutenedione                         |
| DMKETD02 | 71           | 69.1      | 2.7   | 82.1      | -15.7 | 2,2,4,4-tetramethyl-1,3-cyclobutanedione      |
| MOXBEN01 | 84           | 79.1      | 5.8   | 85.1      | -1.3  | 1,4-dimethoxybenzene                          |
| PHTHAO   | 88.6         | 89.8      | -1.3  | 95.5      | -7.8  | phthalic anhydride                            |
| COUMAR02 | 92.2         | 87.9      | 4.7   | 94.2      | -2.1  | coumarin                                      |
| DMTPAL   | 105.1        | 110.3     | -5    | 110.2     | -4.9  | dimethylthyl terephthalate                    |
| INDDON   | 97           | 84.8      | 12.6  | 92.6      | 4.5   | 1,3-indandione                                |
| NAPHQU01 | 91           | 88.9      | 2.3   | 96.2      | -5.7  | 1,4-naphthoquinone                            |
| NBORAN02 | 97           | 96.7      | 0.3   | 103.6     | -6.8  | endo-5-norbornene-2,3-dicarboxylic anhydride  |
| PYMDAN   | 122          | 115.9     | 5     | 149.5     | -22.6 | 1,2,4,5-benzenetetracarboxylic acid anhydride |
| TMOXBZ10 | 100          | 89.2      | 10.8  | 93.4      | 6.6   | 1,3,5-trimethoxybenzene                       |
| BPHENO10 | 93           | 92.4      | 0.7   | 96        | -3.2  | benzophenone                                  |
| BZDIOX01 | 92           | 92.9      | -0.9  | 99.3      | -7.8  | dibenzo b,e 1,4 dioxin                        |
| CONYAH   | 93.1         | 95.2      | -2.2  | 100       | -7.4  | xanthene                                      |
| DBZFUR02 | 84           | 88.7      | -5.5  | 90        | -7.1  | dibenzofuran                                  |
| PARPEE   | 95           | 97.7      | -2.8  | 104.7     | -10.3 | alpha naphthyl acetate                        |

|          |              |           |       |           |        |                                           |
|----------|--------------|-----------|-------|-----------|--------|-------------------------------------------|
| PHBENZ01 | 98           | 103.7     | -5.8  | 107.7     | -9.9   | phenyl benzoate                           |
| CSD name | $\Delta H_s$ | $E_{LIC}$ | D%    | $E_{CLP}$ | D%     | compound name                             |
| RAFFIO01 | 82           | 86.2      | -5.2  | 92.2      | -12.4  | diphenyl ether                            |
| ANTQUO08 | 111          | 113.1     | -1.9  | 113.2     | -2     | 9,10-anthraquinone                        |
| SAZQJT   | 101          | 103.1     | -2.1  | 107.2     | -6.2   | 2-fluorencarboxaldehyde                   |
| HEGSAN01 | 117          | 113.3     | 3.1   | 92        | 21.4   | 1,4-dimethylcubane dicarboxylate          |
| DBEZLM01 | 115          | 109       | 5.2   | 130.1     | -13.1  | dibenzoylmethane                          |
| ANTHAL   | 101          | 104       | -3.1  | 112.1     | -11.1  | 9-anthraldehyde                           |
| AHCHEX01 | 94.2         | 96.9      | -2.9  | 90.6      | 3.9    | alfa-hexachlorocyclohexane                |
| HCCYHB   | 105.2        | 108.4     | -3    | 105.8     | -0.5   | beta-hexachlorocyclohexane                |
| DCLBEN03 | 65           | 68.7      | -5.7  | 71.3      | -9.6   | 1,4-dichlorobenzene                       |
| HCLBNZ14 | 97           | 97.3      | -0.3  | 93.6      | 3.5    | hexachlorobenzene                         |
| PNCLBZ   | 87           | 86.1      | 1.1   | 85.7      | 1.5    | pentachlorobenzene                        |
| TCHLBZ03 | 72.9         | 70.9      | 2.8   | 77.4      | -6.1   | 1,3,5-trichlorobenzene                    |
| DCLBIP   | 96           | 92.4      | 3.8   | 89.2      | 7.1    | 2,2'-dichlorobiphenyl                     |
| DCLBPH   | 150          | 140.1     | 6.6   | 143.1     | 4.6    | decachlorobiphenyl fus+vap                |
| FUHDAN01 | 123.9        | 121.5     | 2     | 125.7     | -1.4   | 3,3',4,4'-tetrachlorobiphenyl             |
| HCLBPH   | 102.7        | 107.5     | -4.7  | 110.6     | -7.6   | 2,2',4,4',6,6'-hexachlorobiphenyl         |
| TCBZFU   | 124.5        | 121.2     | 2.6   | 122.5     | 1.6    | 2,3,7,8-tetrachlorodibenzofuran           |
| TEKQJ    | 100.6        | 113.2     | -12.5 | 113.1     | -12.4  | 2,2',5,5'-tetrachlorobiphenyl             |
| DCLANT10 | 114          | 109.7     | 3.8   | 121       | -6.2   | 9,10-dichloroanthracene                   |
| CLBENQ   | 68.6         | 74.2      | -8.3  | 82.3      | -20    | chlorobenzoquinone                        |
| DCLBQN01 | 70           | 72.3      | -3.3  | 95.7      | -36.8  | 2,6-dichloro-1,4-benzoquinone             |
| BIMVEZ   | 100          | 99.3      | 0.7   | 98.2      | 1.8    | 2-chlorobenzophenone                      |
| DCBDOX10 | 109.7        | 109.7     | 0     | 113.8     | -3.7   | 2,8-dichlorodibenzo b,e 1,4 dioxin        |
| DCBZDX20 | 111.2        | 119.6     | -7.6  | 124.7     | -12.1  | 2,7-dichlorodibenzo b,e 1,4 dioxin        |
| FELSEU   | 112.9        | 124.7     | -10.5 | 130.9     | -15.9  | 1,2,3,4-tetrachlorodibenzo b,e 1,4 dioxin |
| OCDBDO10 | 150.7        | 160.7     | -6.7  | 153.1     | -1.6   | octachlorodibenzo b,e 1,4 dioxin          |
| SESHED   | 98           | 104.3     | -6.4  | 108       | -10.2  | 2-chlorodibenzo b,e 1,4 dioxin            |
| BISJIW   | 70.6         | 65.6      | 7.2   | 68.4      | 3.2    | fumaronitrile                             |
| CAACTY   | 41.2         | 30        | 27.3  | 30.2      | 26.7   | cianoacetylene                            |
| CSD name | $\Delta H_s$ | $E_{LIC}$ | D%    | $E_{CLP}$ | D%     | compound name                             |
| CYAPYR   | 75           | 68        | 9.4   | 67.9      | 9.5    | 4-cyanopyridine                           |
| CYNGEN   | 31.2         | 35.8      | -14.6 | 49.8      | -59.4  | cyanogen                                  |
| DCYANM   | 43.4         | 47.3      | -8.8  | 63.3      | -45.7  | dicyanoacetylene                          |
| MALONT   | 79           | 61.4      | 22.3  | 80.7      | -2.1   | malononitrile                             |
| MUBZOY   | 71           | 74.5      | -4.9  | 78.2      | -10.1  | 2-cyanopyridine                           |
| MUBZUE   | 72           | 70.6      | 2     | 74.9      | -4     | 3-cyanopyridine                           |
| QOPBED   | 70           | 72.8      | -4    | 97.4      | -39.1  | succinonitrile                            |
| TCYETY11 | 83.5         | 78.6      | 5.8   | 142.9     | -71.2  | tetracyanoethylene                        |
| TCYMET   | 61           | 66.2      | -8.6  | 134.7     | -120.9 | tetracyanomethane                         |
| BISJAO02 | 81           | 83.6      | -3.2  | 98.2      | -21.2  | tetramethylsuccinonitrile                 |
| OBIZEE   | 90           | 87.9      | 2.4   | 94.3      | -4.8   | 1,3-dicyanobenzene                        |
| TEPNIT11 | 90           | 89.6      | 0.4   | 94.8      | -5.4   | 1,4-dicyanobenzene                        |

|          |              |           |       |           |       |                                  |
|----------|--------------|-----------|-------|-----------|-------|----------------------------------|
| YUYPUD02 | 87           | 85.2      | 2     | 95.9      | -10.3 | 1,2-dicyanobenzene               |
| JIBDON   | 84           | 76.3      | 9.2   | 84.2      | -0.3  | 2,6-dimethylbenzonitrile         |
| SUZJOB   | 94           | 95.5      | -1.6  | 104.3     | -10.9 | 2-cyanoquinoline                 |
| TCYQME03 | 120.6        | 115       | 4.7   | 148.6     | -23.2 | 7,7,8,8-tetracyanoquinodimethane |
| XOGJAG   | 53.6         | 63.4      | -18.3 | 57.9      | -8    | trifluoromethylbenzene           |
| PUGPIQ   | 95.3         | 92.1      | 3.4   | 91.2      | 4.4   | 2,2'-difluorobiphenyl            |
| ZZAOS02  | 95           | 93.5      | 1.7   | 90.9      | 4.4   | 4,4'-difluorobiphenyl            |
| DUCKOB03 | 32.2         | 32.6      | -1.4  | 39.6      | -22.9 | butane                           |
| JAYDUI   | 24.8         | 26.9      | -8.4  | 35.5      | -43   | propane                          |
| PENTAN01 | 38.9         | 41.9      | -7.6  | 50.8      | -30.6 | pentane                          |
| QQQCIS01 | 25.7         | 27        | -4.8  | 30.3      | -17.7 | cyclopropane                     |
| ZZZVYE01 | 39.5         | 41.7      | -5.6  | 45.9      | -16.1 | cyclopentane                     |
| ZZZWEO02 | 32.9         | 33.9      | -3    | 35.5      | -7.9  | cyclobutane                      |
| BENZEN18 | 44.6         | 44.9      | -0.5  | 48.4      | -8.4  | benzene                          |
| HEXANE01 | 48.6         | 50.6      | -4.1  | 59.7      | -22.8 | hexane                           |
| HEPTAN02 | 55.7         | 57.4      | -3    | 66.8      | -20   | heptane                          |
| ZZZITY02 | 59.4         | 64        | -7.9  | 71.8      | -20.9 | 1,4-dimethylbenzene              |
| CSD name | $\Delta H_s$ | $E_{LIC}$ | D%    | $E_{CLP}$ | D%    | compound name                    |
| BULVAL03 | 72           | 70.2      | 2.4   | 72.4      | -0.6  | bullvalene                       |
| DURENE   | 73           | 68.7      | 5.9   | 80.4      | -10.1 | 1,2,4,5-tetramethylbenzene       |
| NAPHTA10 | 73           | 70        | 4.2   | 77.8      | -6.6  | naphthalene                      |
| BIPHEN04 | 82           | 84.5      | -3.1  | 89.5      | -9.1  | biphenyl                         |
| DMNPTL02 | 83           | 82.9      | 0.2   | 93.2      | -12.2 | 2,6-dimethylnaphthalene          |
| FLUREN01 | 85           | 85        | 0     | 87.8      | -3.3  | fluorene                         |
| ZZMKSO1  | 86           | 89.1      | -3.6  | 93.8      | -9.1  | diphenylmethane                  |
| ANTCEN14 | 97           | 95        | 2.1   | 107.2     | -10.4 | anthracene                       |
| PHENAN08 | 92           | 89.6      | 2.6   | 100       | -8.7  | phenanthrene                     |
| COPMUR   | 75           | 76        | -1.3  | 88.6      | -18.2 | pentamethylbenzene               |
| HMBENZ17 | 84           | 79.4      | 5.5   | 92.1      | -9.6  | hexamethylbenzene                |
| BISDOY   | 83.3         | 91.3      | -9.6  | 94.7      | -13.7 | 9-methylfluorene                 |
| DITBOX01 | 93           | 93        | 0     | 94.3      | -1.4  | 9,10-dihydroanthracene           |
| MANTHR14 | 101          | 94.3      | 6.6   | 103.6     | -2.6  | 9-methylantracene                |
| PYRENE02 | 101          | 95.2      | 5.8   | 104.2     | -3.2  | pyrene                           |
| TOKKIN   | 91.3         | 91.5      | -0.3  | 91.9      | -0.7  | 1-methylfluorene                 |
| BZPHAN01 | 106          | 110.4     | -4.1  | 122.6     | -15.6 | benzo c phenanthrene             |
| CLNIBZ01 | 82           | 79.6      | 2.9   | 75.6      | 7.8   | 1-chloro-3-nitrobenzene          |
| CLNOBE02 | 103          | 119.3     | -15.9 | 119.3     | -15.8 | 1-chloro-2,4,6-trinitrobenzene   |
| FINBIP   | 72           | 76.6      | -6.3  | 73.1      | -1.5  | 1,1,1-trinitroethane             |
| SETVIX   | 81           | 79.8      | 1.5   | 74.6      | 7.8   | 1-chloro-2-nitrobenzene          |
| BECEJY   | 90           | 100.1     | -11.2 | 110.4     | -22.6 | 2,3-dinitro-2,3-dimethylbutane   |
| DNBENZ15 | 85           | 95.1      | -11.9 | 87.1      | -2.4  | 1,3-dinitrobenzene               |
| DNITBZ11 | 95           | 101.8     | -7.2  | 90        | 5.3   | 1,4-dinitrobenzene               |
| NITOLU01 | 77           | 77.8      | -1    | 81.4      | -5.7  | 4-nitrotoluene                   |
| UCOVAL   | 96           | 95.2      | 0.8   | 88.9      | 7.4   | 1-chloromethyl-2-nitrobenzene    |

|          |              |           |       |           |       |                                   |
|----------|--------------|-----------|-------|-----------|-------|-----------------------------------|
| ZZZFYW02 | 93           | 101.1     | -8.8  | 93.9      | -1    | 1,2-dinitrobenzene                |
| ZZZQSC02 | 99           | 102.4     | -3.4  | 93        | 6.1   | 2,6-dinitrotoluene                |
| TNPHNT   | 121.8        | 121.9     | -0.1  | 131.7     | -8.1  | 2,4,6-trinitrophenetole           |
| CSD name | $\Delta H_s$ | $E_{LIC}$ | D%    | $E_{CLP}$ | D%    | compound name                     |
| NTRANT01 | 114.6        | 112.4     | 2     | 118.1     | -3    | 9-nitroanthracene                 |
| BDTOLE11 | 94.9         | 100.7     | -6.1  | 99.2      | -4.5  | tetrathiafulvene                  |
| BETHAZ01 | 71           | 82        | -15.5 | 114.5     | -61.3 | 2,1,3-benzothiadiazole            |
| DITHAN03 | 71           | 77.4      | -9    | 64.2      | 9.6   | 1,4-dithiane                      |
| DMSULO04 | 77           | 87.5      | -13.6 | 84.3      | -9.5  | dimethyl sulfone                  |
| DTOLTO   | 82           | 81.5      | 0.6   | 78.1      | 4.8   | 1,3-dithiolan-2-thione            |
| IXANOK   | 80           | 79.3      | 0.9   | 80.8      | -1    | 1,3-dithiolan-2-one               |
| OFIZEK   | 84           | 87        | -3.6  | 81.4      | 3     | tetramethylthiourea               |
| OWEKEH   | 73           | 76.8      | -5.2  | 80.3      | -10   | tetrahydro-4H-thiopyran-4-one     |
| PUVVUZ   | 89.2         | 94.1      | -5.5  | 85.3      | 4.4   | 1,3-dithian-2-thione              |
| THIOUR16 | 108.6        | 84.4      | 22.3  | 69.8      | 35.7  | thiourea                          |
| TPENAC02 | 97.4         | 95.4      | 2.1   | 91.8      | 5.8   | 2-thiophene carboxylic acid       |
| TRITAN10 | 94           | 86.6      | 7.9   | 72.3      | 23.2  | 1,3,5-trithiane                   |
| YIFZAP   | 115          | 113.7     | 1.1   | 104.6     | 9     | benzenesulfonamide                |
| DTENYL02 | 85.6         | 88.5      | -3.4  | 108.6     | -26.8 | 2,2-bithiophene                   |
| MPSUFO01 | 92           | 96.5      | -4.9  | 87        | 5.4   | MEphenylsulfone                   |
| FABPON11 | 123          | 114.2     | 7.1   | 126.3     | -2.7  | 5-phenyl-1,2-dithiole-3-thione    |
| PRYLTS   | 96           | 111.6     | -16.2 | 110.9     | -15.5 | p-tolyl propenylsulfone           |
| DBZTHP   | 96           | 96.9      | -0.9  | 103.8     | -8.1  | dibenzothiophene                  |
| DPSULO   | 106          | 112.2     | -5.8  | 104.1     | 1.7   | diphenyl sulfone                  |
| PHESA01  | 115          | 106.8     | 7.1   | 106.8     | 7.1   | phenothiazine                     |
| THIANT03 | 100          | 107.6     | -7.6  | 100.7     | -0.6  | thianthrene                       |
| TOXANT   | 101          | 100.8     | 0.2   | 102.7     | -1.7  | thioxanthene                      |
| MOYGUC01 | 62.2         | 77.6      | -24.8 | 74.2      | -19.3 | thiocamphor                       |
| TUXFIC02 | 125          | 142.7     | -14.1 | 140       | -12   | dibenzyl sulfone                  |
| AMIPYR   | 83           | 74.7      | 10    | 76.3      | 8.1   | 3-aminopyridine                   |
| AMMTAZ01 | 91.8         | 93.8      | -2.2  | 97.9      | -6.6  | 2-methyl-5-aminotetrazole         |
| AMPYRD   | 78           | 71.6      | 8.3   | 83        | -6.4  | 2-aminopyridine                   |
| AMPYRE01 | 88           | 83.8      | 4.8   | 90.1      | -2.4  | 4-aminopyridine                   |
| CSD name | $\Delta H_s$ | $E_{LIC}$ | D%    | $E_{CLP}$ | D%    | compound name                     |
| CAGPUV01 | 85           | 84.8      | 0.2   | 79.5      | 6.5   | 3,4-dichloro-1-nitrobenzene       |
| CARDOO   | 109          | 98.4      | 9.7   | 107.6     | 1.3   | 4,5-dichloro-2-nitroaniline       |
| CLNOAN   | 109          | 101.2     | 7.2   | 109.6     | -0.6  | 2,6-dichloro-4-nitroaniline       |
| CUVJUY   | 101.9        | 99.3      | 2.6   | 102.5     | -0.6  | 1,4-diNOpiperazine                |
| DATNBZ01 | 145          | 135.2     | 6.7   | 171.3     | -18.2 | 1,3-diamino-2,4,6-trinitrobenzene |
| DCHLAN01 | 83           | 79.8      | 3.9   | 87.7      | -5.7  | 2,5-dichloroaniline               |
| GETVEH   | 74           | 77.4      | -4.7  | 79.4      | -7.3  | 2,3,5-trichloropyridine           |
| HIBWEU   | 83           | 81.8      | 1.5   | 82        | 1.2   | 3,5-dichloro-1-nitrobenzene       |
| KOMYEQ01 | 80           | 82.6      | -3.3  | 96.2      | -20.2 | N-methylsuccinimide               |
| LETNAZ01 | 103          | 97.5      | 5.3   | 99.9      | 3     | 3,5-dimethyl-4-NOpazole           |



|          |              |           |       |           |       |                                    |
|----------|--------------|-----------|-------|-----------|-------|------------------------------------|
| NANILI31 | 101          | 98.6      | 2.4   | 104.8     | -3.8  | 4-nitroaniline                     |
| NICOAC02 | 115          | 102.2     | 11.1  | 92.4      | 19.7  | 3-pyridinecarboxylic               |
| PICANO04 | 95.8         | 93.9      | 2     | 96.9      | -1.1  | pyridine-2-carboxylic acidNoxide   |
| RAKSIG   | 151.7        | 147.8     | 2.6   | 142.6     | 6     | 6-mercaptapurine                   |
| UCECAG02 | 115          | 115.3     | -0.3  | 118.9     | -3.4  | 2-chloro-4,6-dinitroaniline        |
| WEMDAT   | 82           | 74.1      | 9.7   | 81.2      | 0.9   | 2,3-dichloroaniline                |
| WEMDEX   | 74           | 71.9      | 2.9   | 79.6      | -7.5  | 2,6-dichloroaniline                |
| WEMDIB   | 85           | 77.4      | 8.9   | 84.3      | 0.8   | 2,4-dichloroaniline                |
| XAGWIM02 | 100.2        | 101.7     | -1.4  | 99.1      | 1.2   | pyrrole-2-carboxylic acid          |
| YOVCAO   | 100          | 98.5      | 1.5   | 106.2     | -6.2  | 2-chloro-5-nitroaniline            |
| ZZZEKW02 | 87           | 82.4      | 5.3   | 77.5      | 11    | 2,5-dichloro-1-nitrobenzene        |
| AMBACO08 | 110          | 96.4      | 12.3  | 100.4     | 8.8   | 2-aminobenzoic acid                |
| BEOXAZ   | 65           | 75.2      | -15.6 | 64.5      | 0.8   | benzofurazan                       |
| BIPJUF   | 135          | 134.9     | 0.1   | 121.5     | 10    | 2,4-dinitrobenzoic acid            |
| CLANIC06 | 86           | 73.1      | 15    | 80.8      | 6     | 4-chloroaniline                    |
| MEADEN05 | 124          | 127.8     | -3    | 142.3     | -14.7 | 9-methyladenine                    |
| NBZOAC12 | 120          | 118.8     | 1     | 110.9     | 7.6   | 4-nitrobenzoic acid                |
| NBZOA004 | 119          | 115.8     | 2.7   | 113.4     | 4.7   | 2-nitrobenzoic acid                |
| PNBZNT   | 91           | 92.7      | -1.9  | 90.8      | 0.2   | 4-nitrobenzotrile                  |
| CSD name | $\Delta H_s$ | $E_{LIC}$ | D%    | $E_{CLP}$ | D%    | compound name                      |
| RAJGUG   | 89           | 70.6      | 20.7  | 69.8      | 21.5  | 2-methylpyridine Noxide            |
| RICFEP01 | 81           | 78.6      | 3     | 86.4      | -6.7  | 2-acetylpyrrole                    |
| TNIOAN02 | 125.2        | 129.1     | -3.1  | 143.4     | -14.5 | 2,4,6-trinitroaniline              |
| AMACPH01 | 93.3         | 98.8      | -5.9  | 113.3     | -21.5 | 4-aminoacetophenone                |
| AMBNAC12 | 116          | 116.2     | -0.2  | 108.4     | 6.6   | 4-aminobenzoic acid                |
| AMEBAC   | 107          | 103.9     | 2.9   | 116.6     | -9    | 2-amino-3-methylbenzoic acid       |
| ANISIC04 | 111          | 109.3     | 1.6   | 105.9     | 4.6   | 4-methoxybenzoic acid              |
| DIMNAN01 | 102          | 105.9     | -3.8  | 116.2     | -13.9 | N,N-dimethyl-4-nitroaniline        |
| DMADEN11 | 117          | 109.7     | 6.3   | 119.4     | -2    | N,N-dimethyladenine                |
| FUFBOX   | 107          | 108.8     | -1.7  | 108.1     | -1    | 2-methoxybenzoic acid              |
| MBNZAM10 | 83.2         | 88.6      | -6.4  | 89.1      | -7    | N-methylbenzamide                  |
| MNTDMA01 | 93           | 96.5      | -3.8  | 98.3      | -5.7  | 3-nitro-N,N-dimethylaniline        |
| MODYAG01 | 138.2        | 122       | 11.7  | 134.9     | 2.4   | 4-aminophthalimide                 |
| DMOXB01  | 122          | 128.8     | -5.6  | 133.5     | -9.4  | 2,6-dimethoxybenzoic acid          |
| DMXBZA01 | 130          | 117       | 10    | 117.6     | 9.6   | 3,4-dimethoxybenzoic acid          |
| HEKMOZ   | 127          | 123       | 3.1   | 121.3     | 4.5   | 3,5-dimethoxybenzoic acid          |
| ISUQUI   | 123          | 126.2     | -2.6  | 120.4     | 2.1   | 2,4-dimethoxybenzoic acid          |
| ISURAP   | 116          | 109.9     | 5.3   | 119.5     | -3    | 2,5-dimethoxybenzoic acid          |
| NONMEI   | 93           | 83.4      | 10.4  | 96.6      | -3.8  | 8-aminoquinoline                   |
| ODOTOQ   | 93           | 84.4      | 9.2   | 86.8      | 6.6   | N,N-dimethylbenzamide              |
| PICGAJ   | 109          | 109.2     | -0.2  | 126.9     | -16.4 | 3-amino-1-phenyl-but-2-enone       |
| SECQEY   | 104          | 96.3      | 7.4   | 101.1     | 2.7   | 3-aminoquinoline                   |
| UPAJIF   | 107          | 104.5     | 2.3   | 102.1     | 4.6   | 8-nitroquinoline                   |
| VAKJUM   | 124          | 105       | 15.3  | 109.1     | 12    | 2,3-dimethylquinoxaline 1,4dioxide |

|          |              |           |       |           |       |                                    |
|----------|--------------|-----------|-------|-----------|-------|------------------------------------|
| ZZZFLM01 | 129          | 117.5     | 8.9   | 116.6     | 9.6   | trans-2-methoxycinnamic            |
| ZZZPRC03 | 106          | 88.3      | 16.7  | 100.6     | 5.1   | 1-methyl-1H-indole-2,3-dione       |
| CINMAC   | 107          | 101.8     | 4.9   | 96.4      | 9.9   | trans cinnamic acid                |
| MXCINN02 | 134          | 117.2     | 12.5  | 113.3     | 15.4  | trans-4-methoxycinnamic            |
| OVERAT01 | 117          | 121.7     | -4    | 120.2     | -2.8  | 2,3-dimethoxybenzoic acid          |
| CSD name | $\Delta H_s$ | $E_{LIC}$ | D%    | $E_{CLP}$ | D%    | compound name                      |
| PEXBZA   | 123          | 117.5     | 4.5   | 112.9     | 8.2   | 4-ethoxybenzoic acid               |
| ZZZNRU02 | 124          | 118.6     | 4.4   | 116.2     | 6.3   | trans-3-methoxycinnamic            |
| HIBXOF   | 135          | 126.6     | 6.2   | 140       | -3.7  | acridone                           |
| DMPIPA   | 80           | 80.9      | -1.2  | 91.3      | -14.2 | 2-methyl-2-piperidinopropionitrile |
| EACDRO01 | 117          | 117       | 0     | 133       | -13.7 | 10-ethylacridin-9(10H)-one         |
| NMACRO11 | 105          | 118.4     | -12.8 | 126.5     | -20.5 | 10-methylacridin-9 10H -one        |
| FEXBOZ   | 87           | 89.7      | -3.1  | 105.6     | -21.4 | benzylidene t-Bu amine Noxide      |
